# Supplementary material for: Performance assessment of a generic repository in salt host rock based on Task F of DECOVALEX-2023 – BASE's lessons learnt and future work
Source: Copernicus journal article supplement (doi:10.5194/sand-2-125-2023), 2023-09-06
Supplement: Supplementary file 1 [file sand-2-125-2023-supplement.pdf]

Supplement of Saf. Nucl. Waste Disposal, 2, 125–125, 2023  
<https://doi.org/10.5194/sand-2-125-2023-supplement>  
© Author(s) 2023. CC BY 4.0 License.

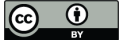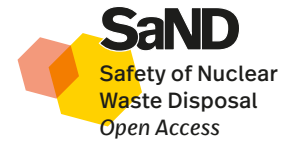

*Supplement of*

## **Performance assessment of a generic repository in salt host rock based on Task F of DECOVALEX-2023 – BASE’s lessons learnt and future work**

**Marek Pekala et al.**

*Correspondence to:* Marek Pekala (marek.pekala@base.bund.de)

The copyright of individual parts of the supplement might differ from the article licence.



# Performance assessment of a generic repository in salt host rock based on Task F of DECOVALEX-2023

BASE's lessons learnt and future work

M. Pekala, Carl R. Dietl, F. Magri, I. Kock and C. Borkel

Bundesamt für die Sicherheit der Nuklearen Entsorgung (BASE)

E-Mail: marek.pekala@base.bund.de

## INTRODUCTION

- DECOVALEX (**D**evelopment of **C**oupled models and their **V**alidation against **E**xperiments) is an international cooperative project, initiated in 1992, that aims to help better represent coupled THCM processes in PA of disposal systems for HLW ([www.decovalex.org](http://www.decovalex.org))
- BASE co-funds and participates actively in Task F of DECOVALEX-2023 with the aim to exchange state-of-the-art modelling approaches and methodologies, develop further competence in process modelling, and assist in development of in-house PA tools
- This poster discusses selected aspects of BASE's contribution to Task F2 (disposal in saltrock) of DECOVALEX-2023

## APPROACH and IMPLEMENTATION

Overall approach:

- The problem was pre-defined by a detailed Task Specification document (publishing pending)
- Modelling was carried out by (largely) independent teams (no comparison shown here)
- Individual processes were tested and implemented in a step-wise manner

Main features of the model include:

- Implementation in the PFLOTRAN code
- Fully unstructured finite volume grids
- Evolution modelled over 100 000 years
- Canister failure and radionuclide release at 500 years
- Shaft failure and surface water ingress at 1 000 years
- Simplified salt convergence (porosity reduction) based on external model calculations
- Variably-liquid saturated, isothermal conditions
- Instant- and congruent waste dissolution release of I-129, Tc-99, U-238, U-234, Th-230 and Ra-226
- Radioactive decay and decay-chains
- Elemental solubility limits
- Transport by diffusion and advection in liquid phase

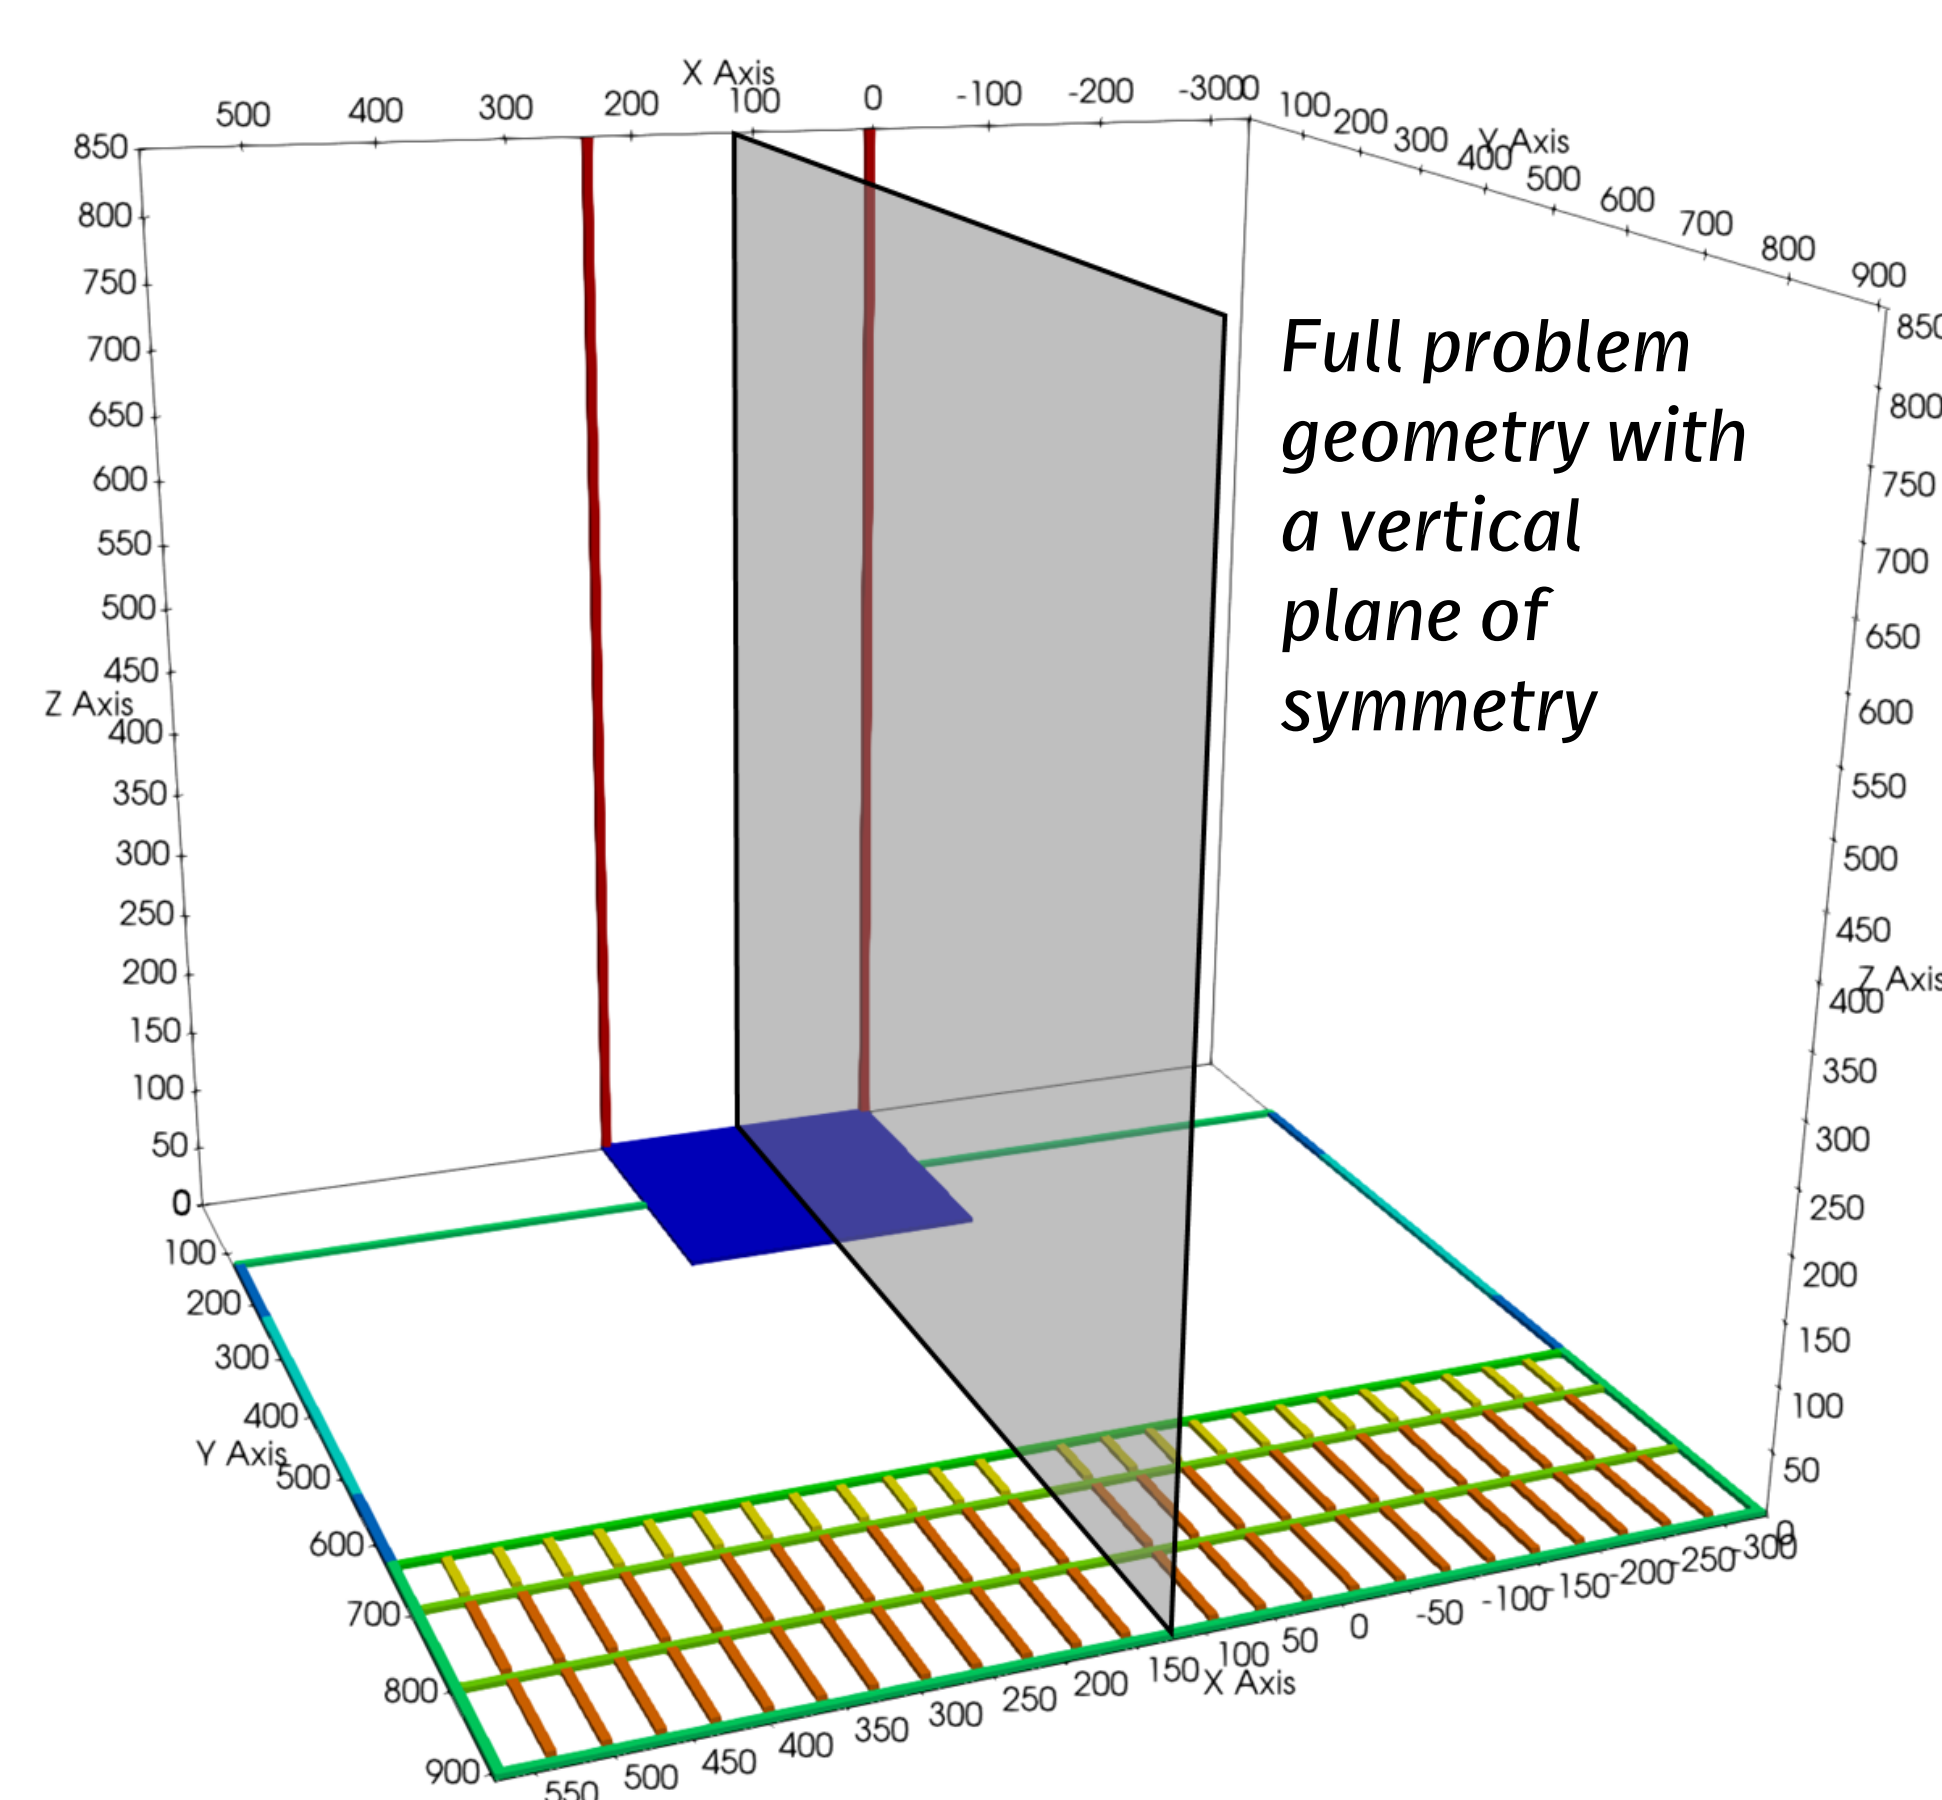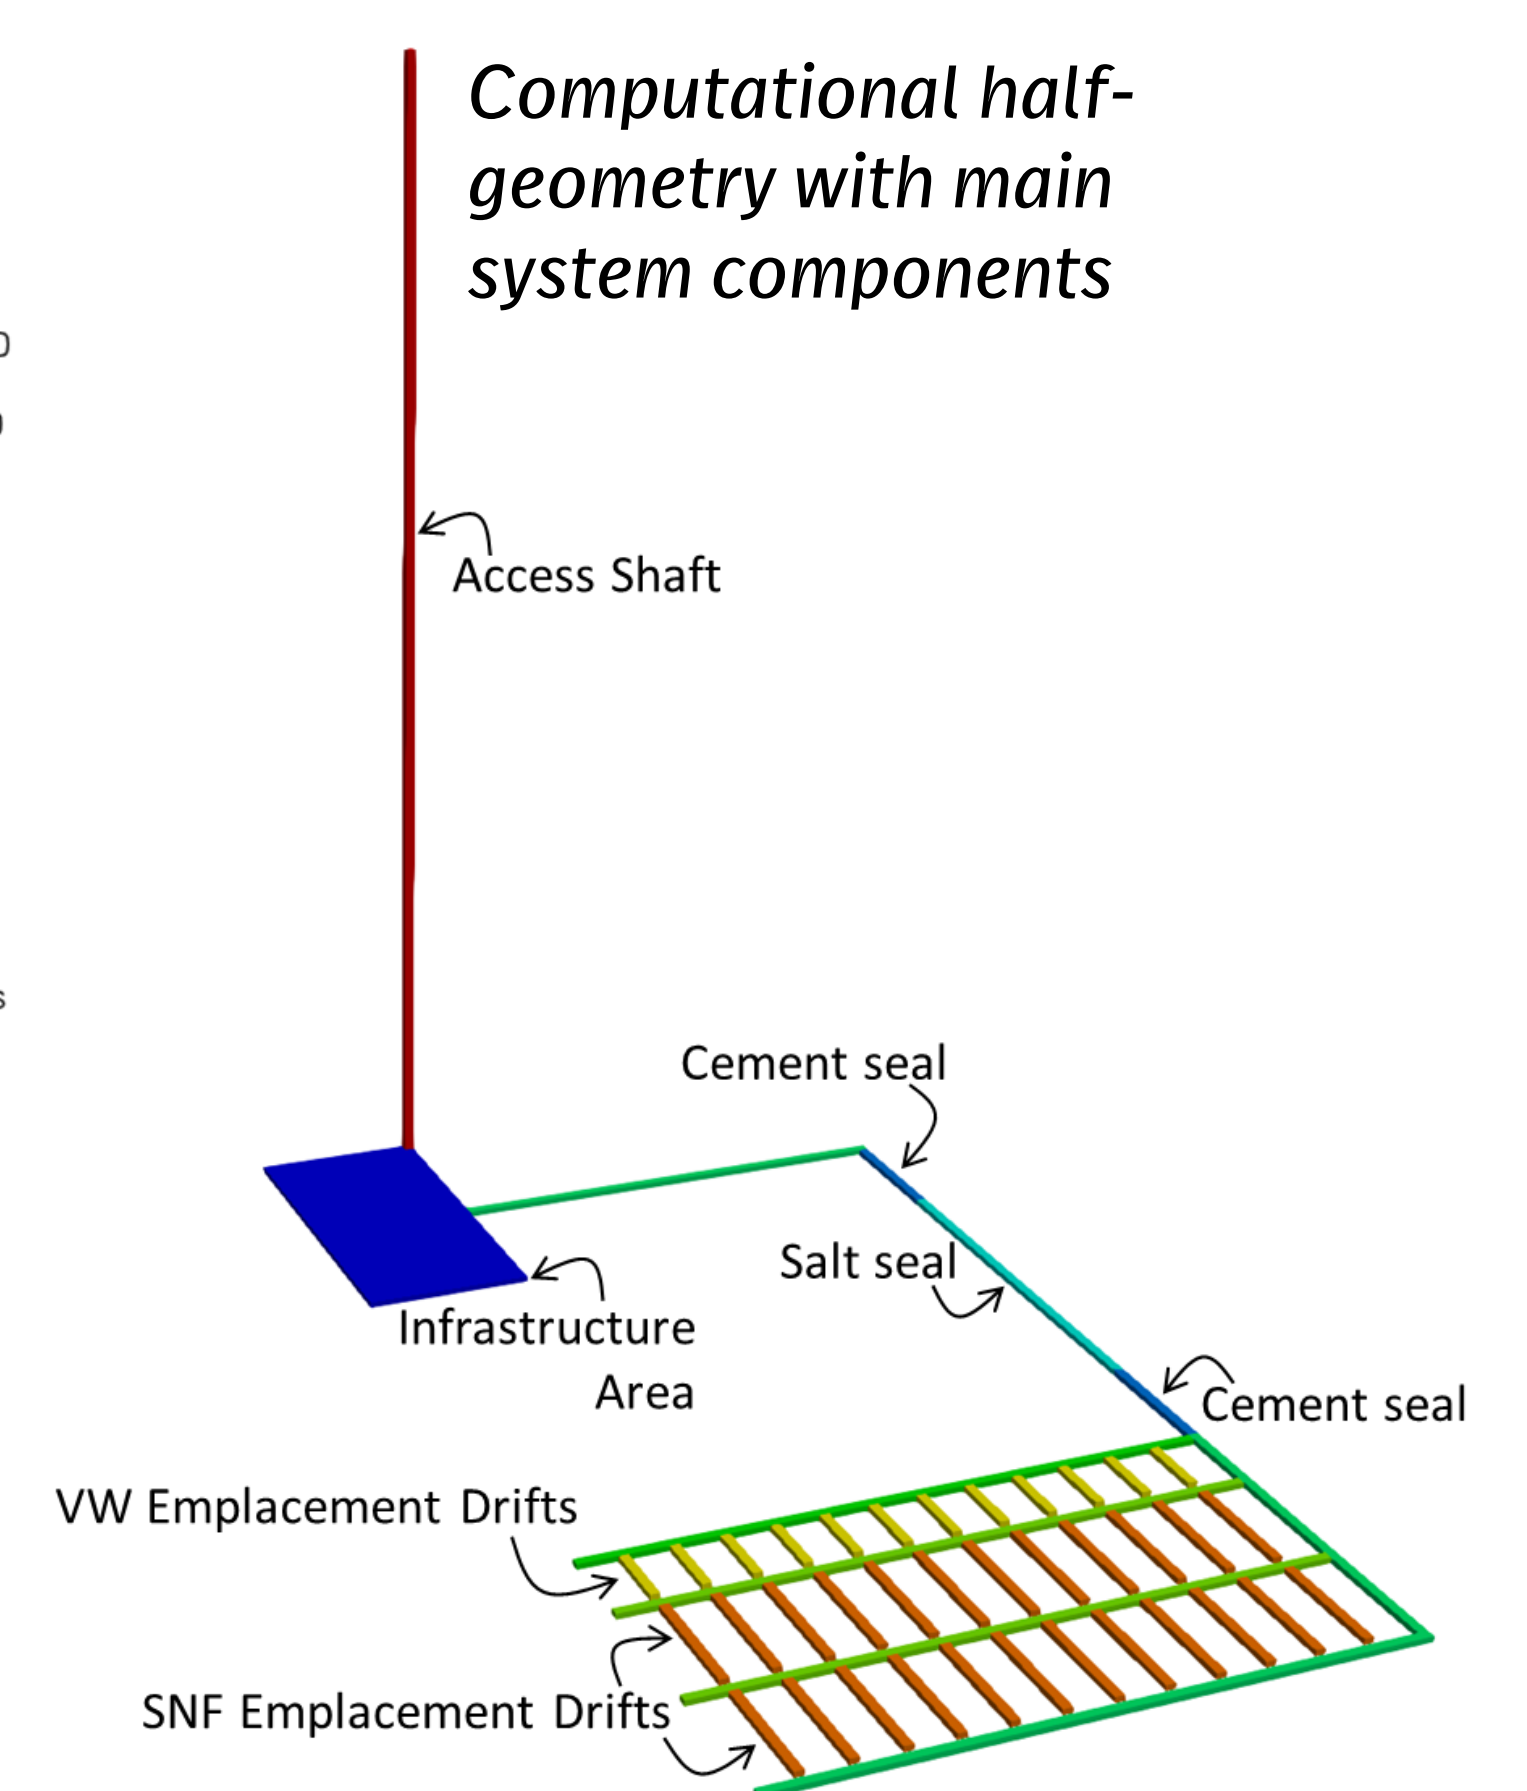

## CONTRIBUTION and EXAMPLE RESULTS

- Model results require extensive post-processing and analysis
- BASE provided 21 pre-defined quantities of interest for inter-model comparison (Final Task Report)
- Many auxiliary quantities were additionally presented and used for system behaviour understanding

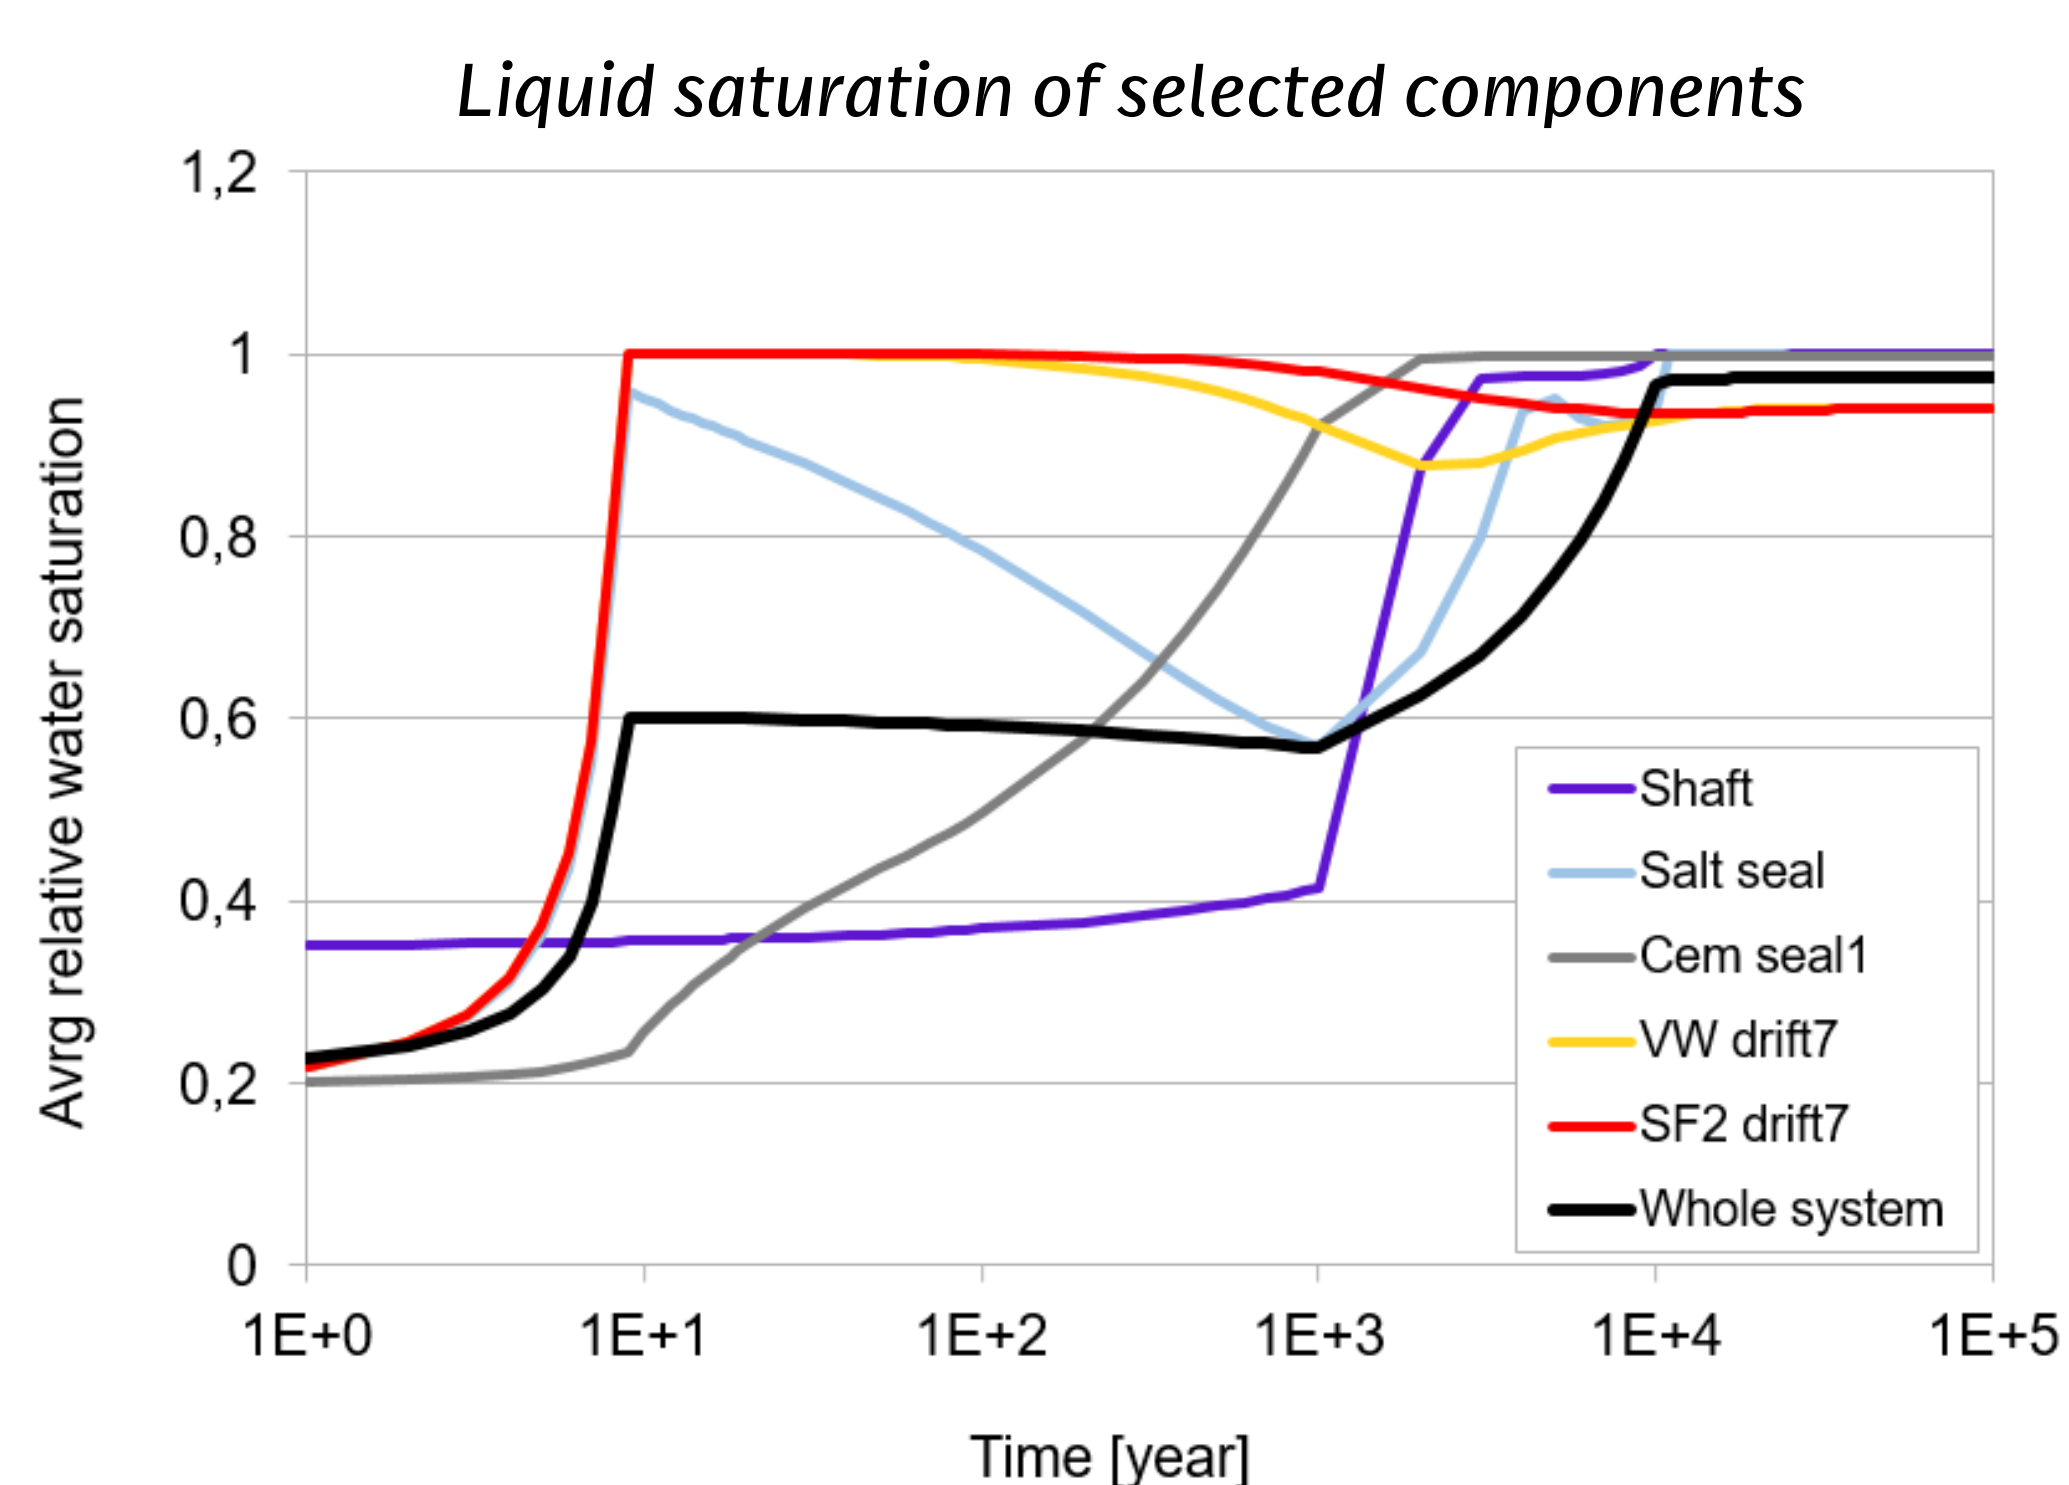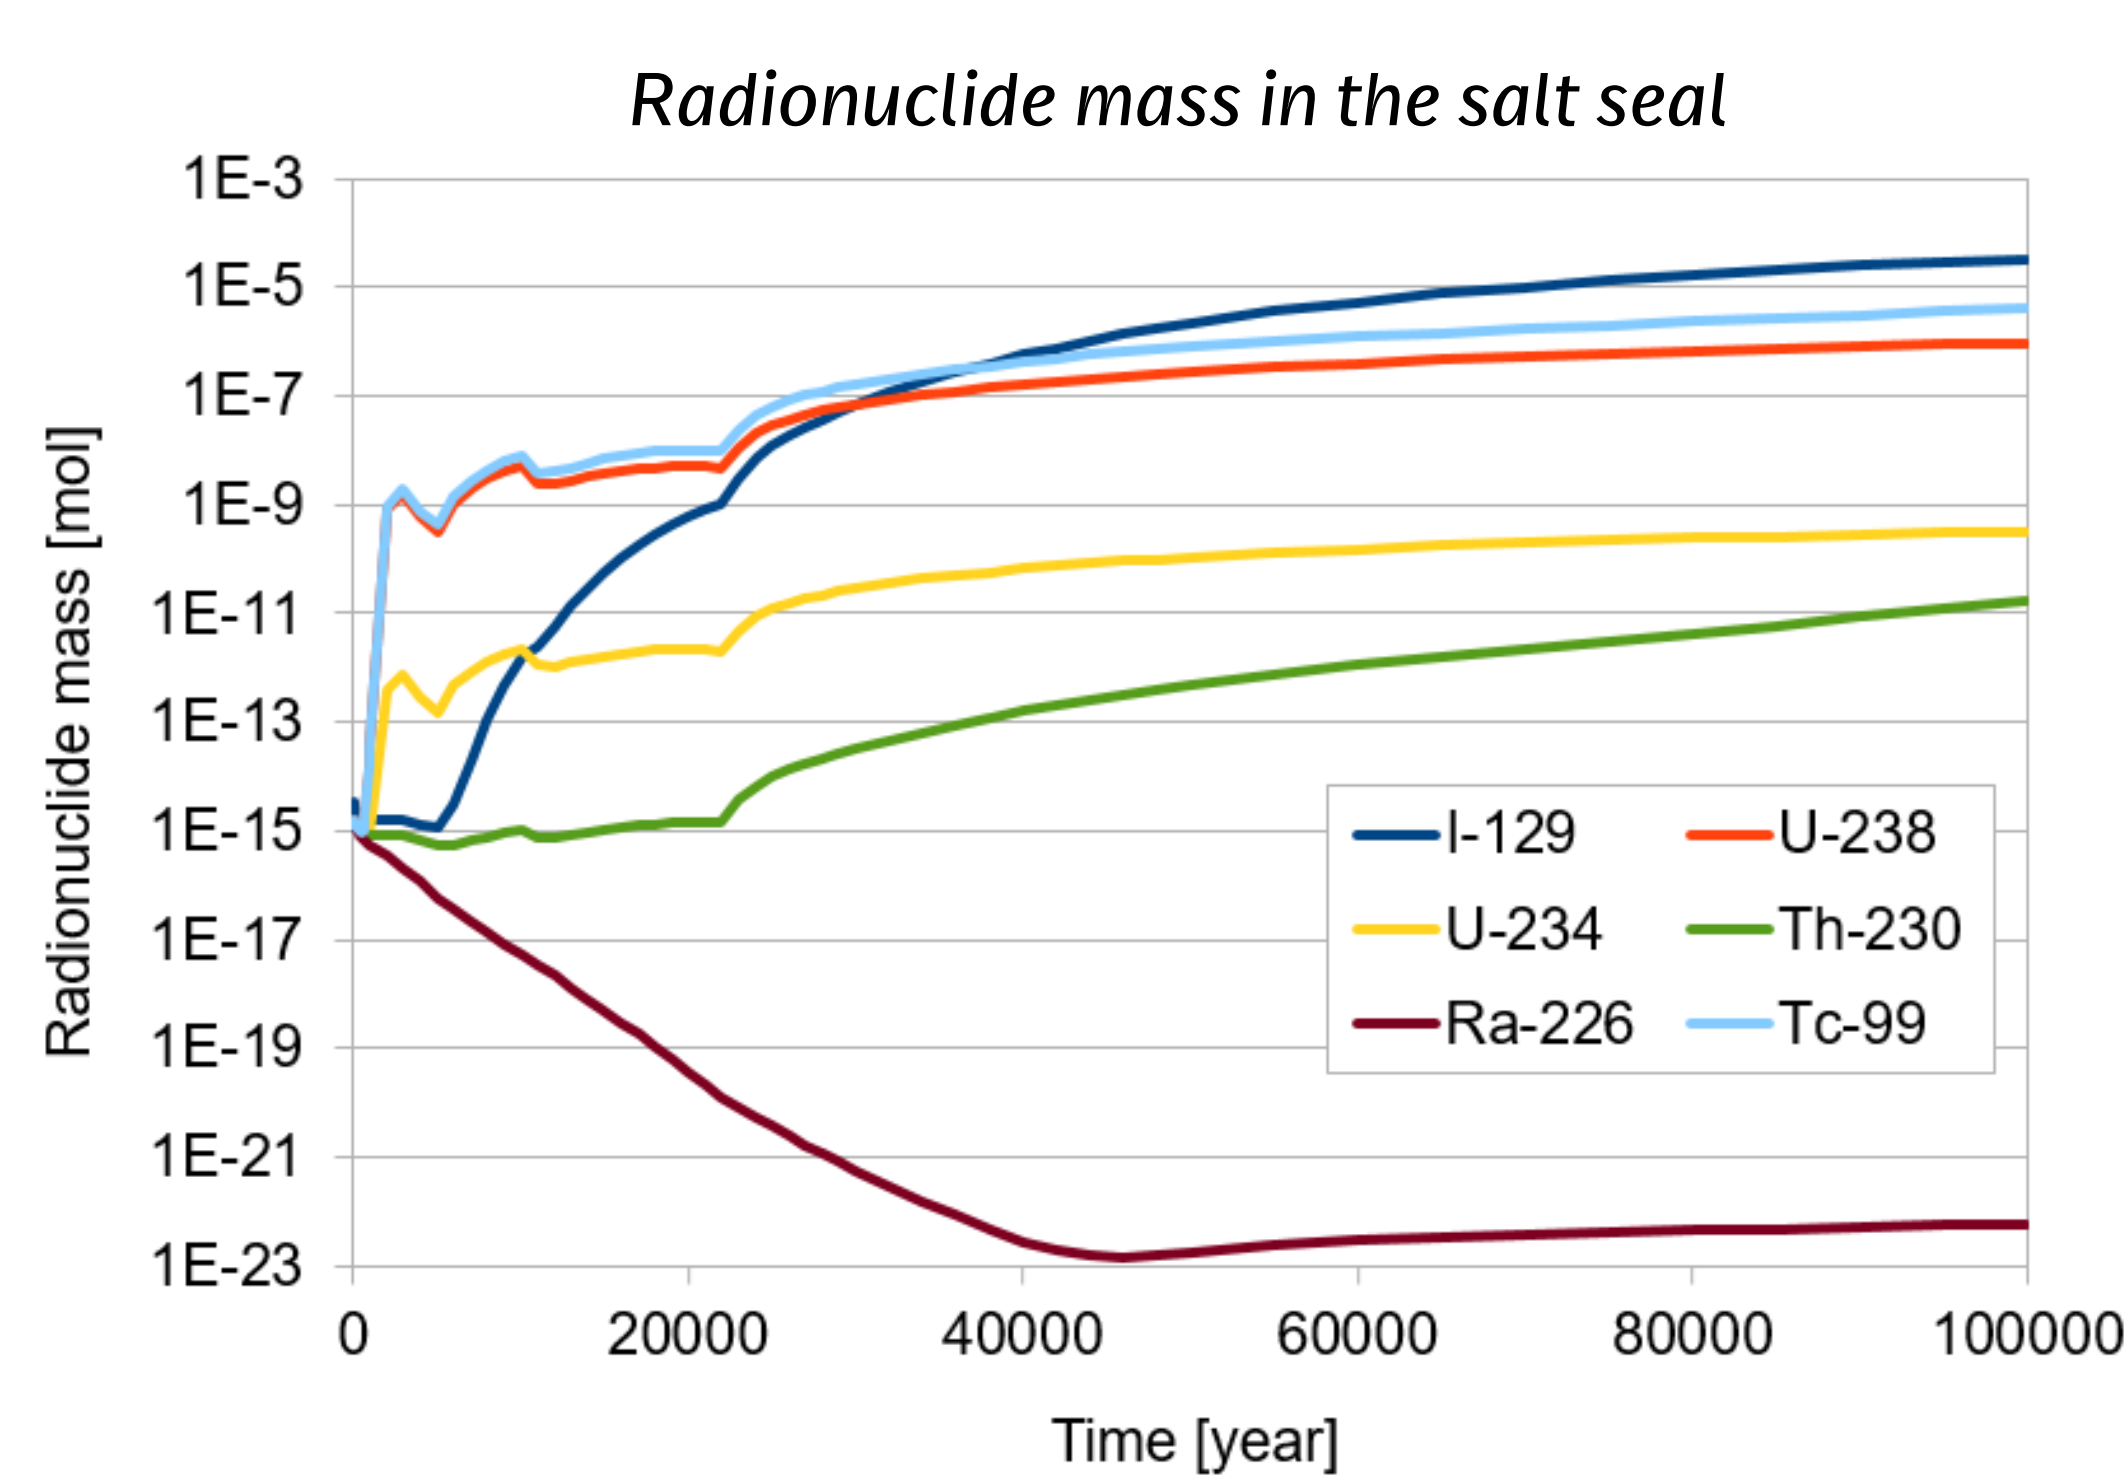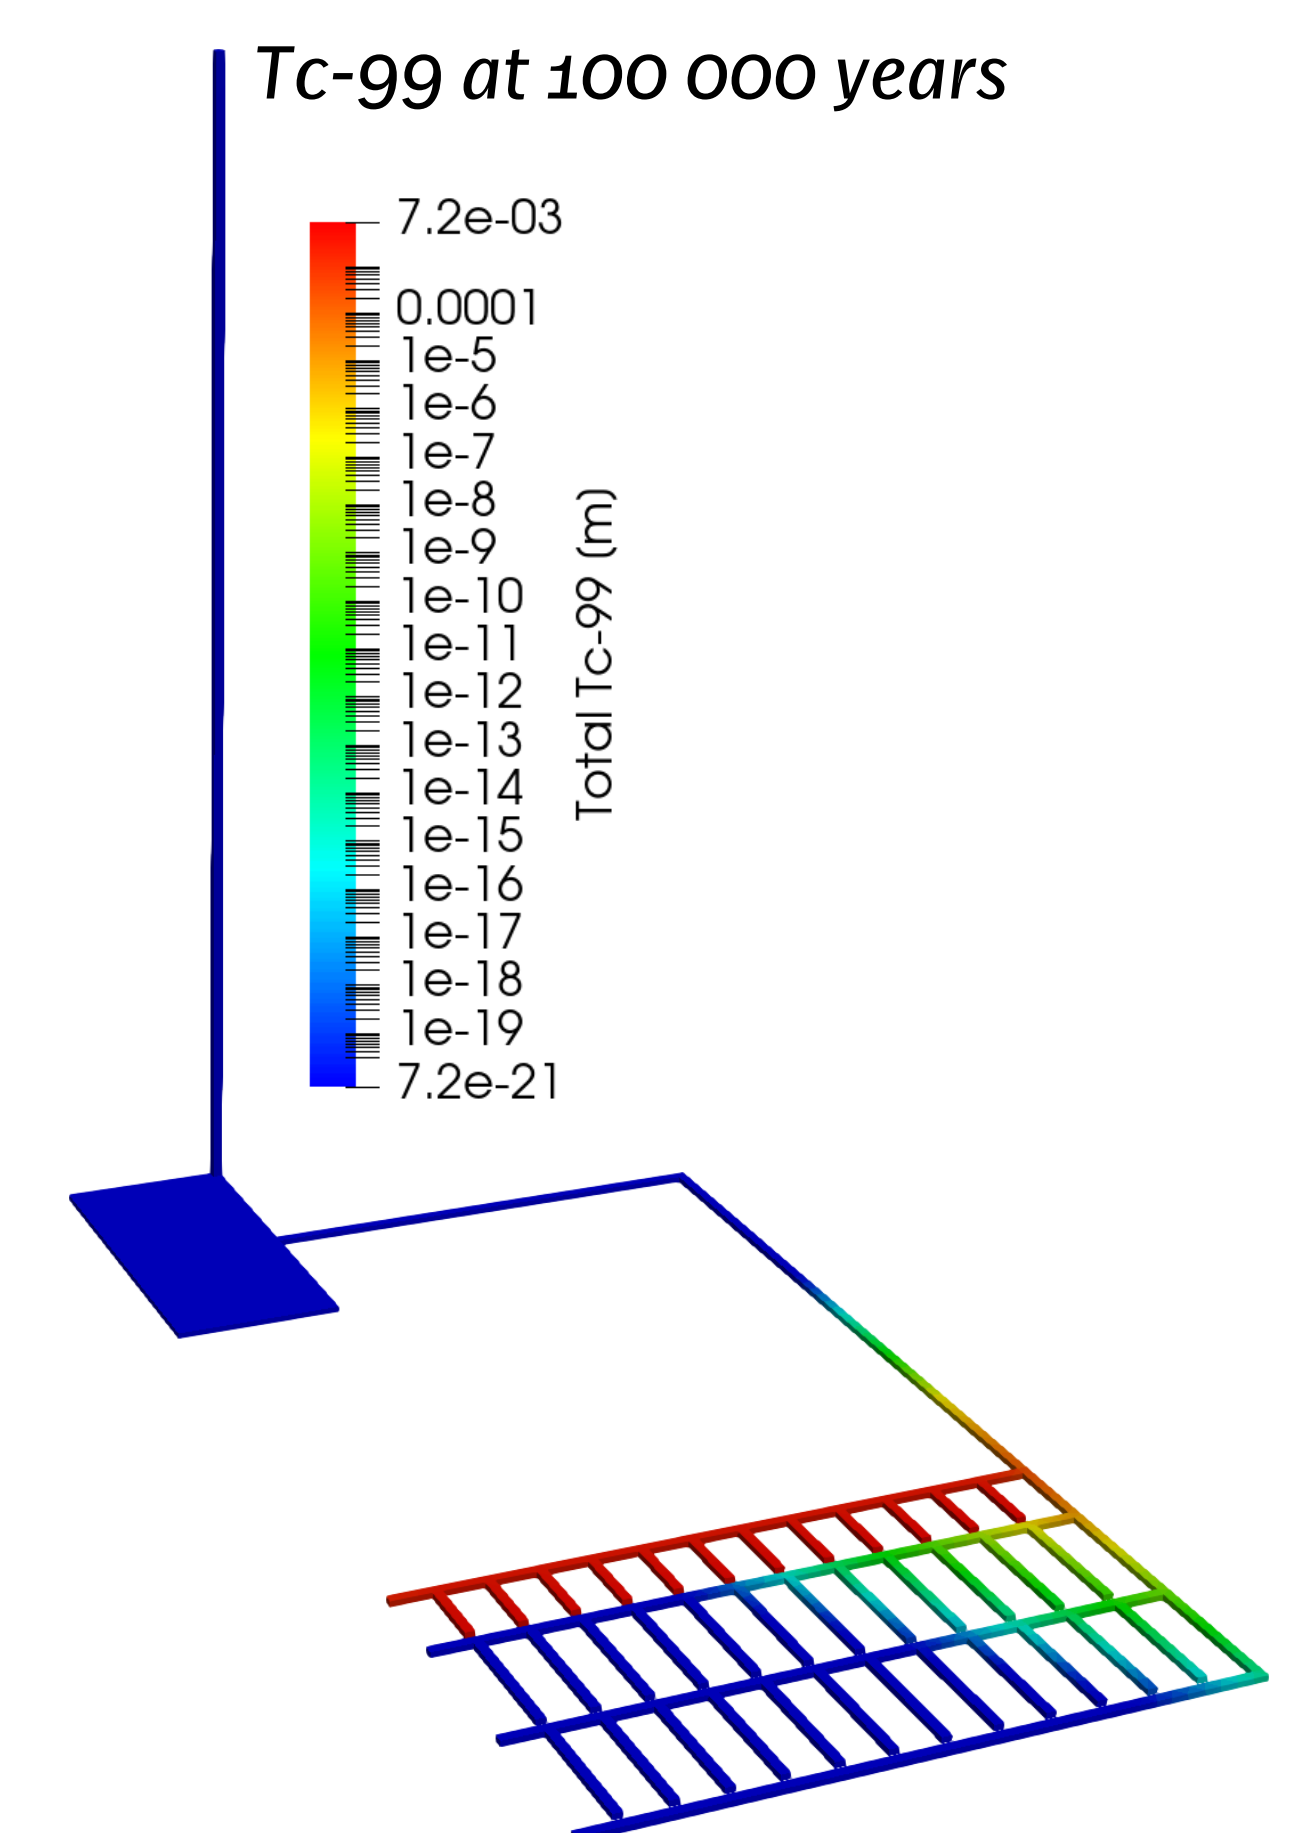

## LESSONS LEARNT

- A preliminary workflow allowing large-scale PA simulations (including pre- and post-processing) has been developed
- Valuable hands-on experience has been gained by comparing approaches and discussing problems with other teams
- Due to its coupled and non-linear nature, the model's behaviour is complex and highly sensitive to certain parameter values
- There are specific advantages and disadvantages to developing "fully integrated" and "nested" models
- Costs of model elaboration increase rapidly and need to be balanced vis-à-vis benefits
- Development of complex models requires maintaining and developing necessary competence and resources
- Synergies with existing in-house projects should be explored further and taken advantage of

## OUTLOOK

- The computational workflow will continue to be elaborated (e.g. biosphere/dose model, probabilistic sampling, integration via scripting)
- Additional process (e.g. 2-phase flow, non-isothermal conditions) will be included
- Systematic sensitivity and uncertainty assessment will be carried out
- Comparison with simplified models will help evaluate the role of individual processes and their model representation
- High Performance Computing will be employed for more efficient numerical solution (e.g. probabilistic uncertainty analysis)
